# Supplementary material
Source: publisher figshare collection journal article supplement (https://frontiersin.figshare.com/ndownloader/files/33902579)
Supplement: Supplementary file [file 33902579]

## Hyperkalemia

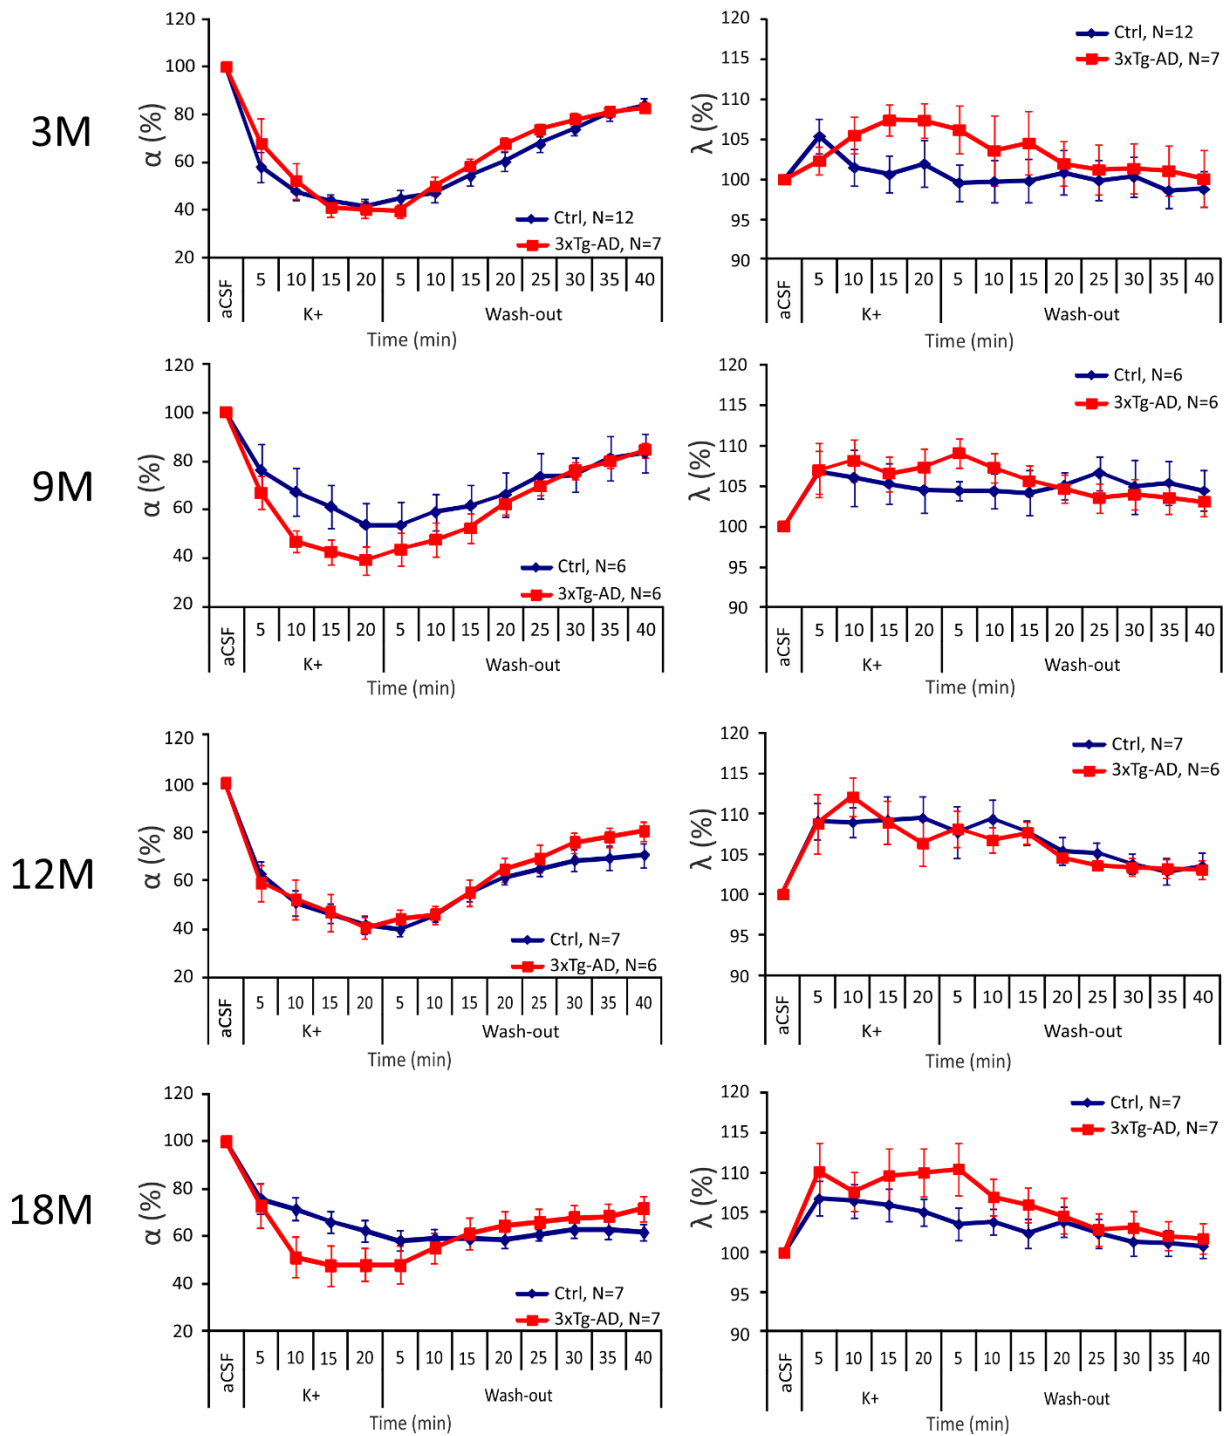

**Supplementary Fig. 3. Age-dependent changes of the relative values of the ECS diffusion parameters in control and 3xTg-AD mice evoked by severe hyperkalemia (50 mM K<sup>+</sup>).** Left: Time course of the volume fraction ( $\alpha$ ) changes during a 20-min application of aCSF<sub>K<sup>+</sup></sub> and a 40-min washout in 3-, 9-, 12- and 18-month-old Ctrl animals and age-matched 3xTg-AD mice. Right: Time course of tortuosity ( $\lambda$ ) changes during an aCSF<sub>K<sup>+</sup></sub> application and following washout in 3-, 9-, 12- and 18-month-old control animals and age-matched 3xTg-AD mice. To estimate the relative changes, the control values were set to 100%, and the relative changes were calculated and presented as mean  $\pm$  SEM. No significant

differences between Ctrl and age-matched 3xTg-AD mice in the relative values of the ECS diffusion parameters were detected.

Ctrl – control mice; 3xTg-AD – triple transgenic model of AD; 3M, 9M, 12M, 18M – 3-, 9-, 12-, 18-month-old animals; aCSF - artificial cerebrospinal fluid; K<sup>+</sup> - artificial cerebrospinal fluid with 50 mM K<sup>+</sup>; N - number of animals.
